# Supplementary material for: Chromatin target of protein arginine methyltransferase regulates invasion, chemoresistance, and stemness in epithelial ovarian cancer
Source: Oxford University Press journal article supplement (doi:10.1042/bsr20190016), 2019-03-25

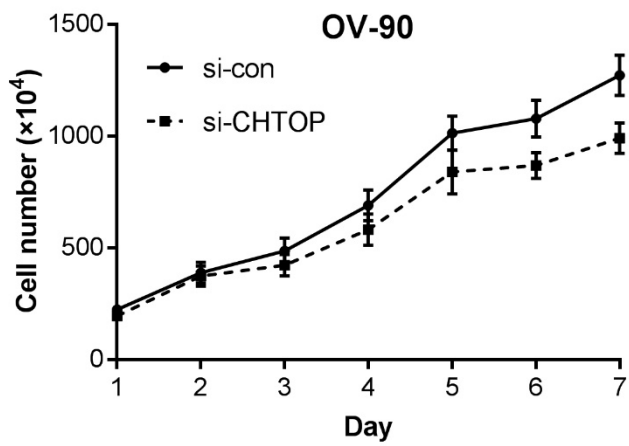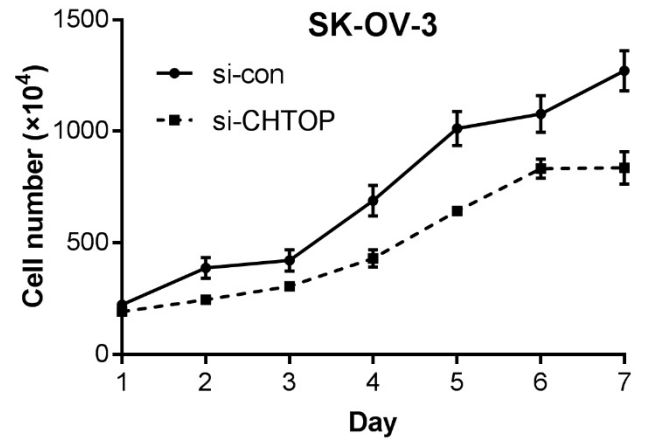

**Supplementary Figure S1. CHTOP knockdown inhibited the cell proliferation rates of OV-90 and SK-OV-3 cells.**

OV-90 and SK-OV-3 cells were treated with si-con and si-CHTOP for 72 h and then the proliferation rates of OV-90 and SK-OV-3 cells were detected using a commercial kit during 7 consecutive days. The proliferation rates of OV-90 and SK-OV-3 cells in si-CHTOP group were obviously decreased compared with the corresponding si-con group. Data were expressed as mean  $\pm$  S.E.M. (n=5).

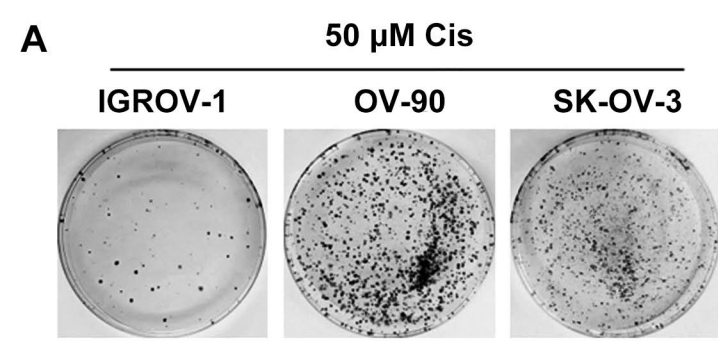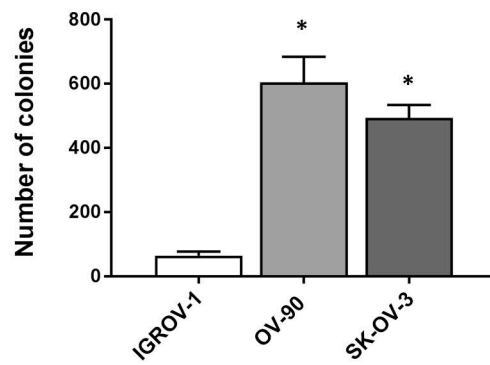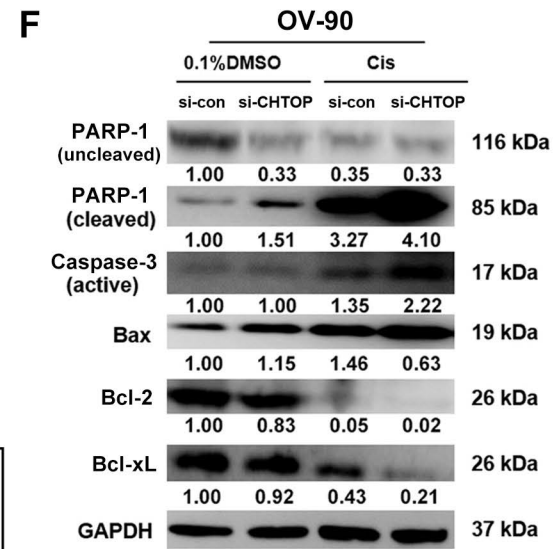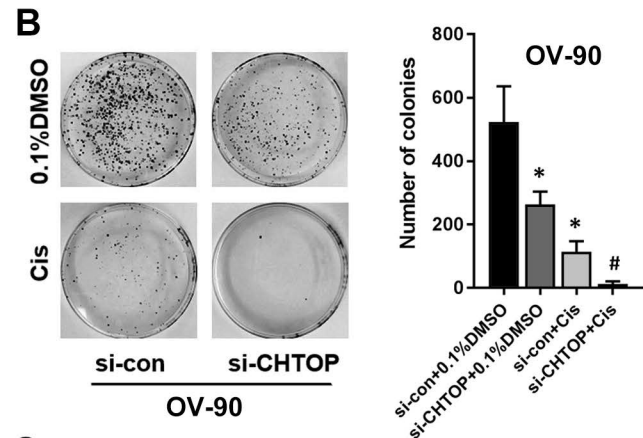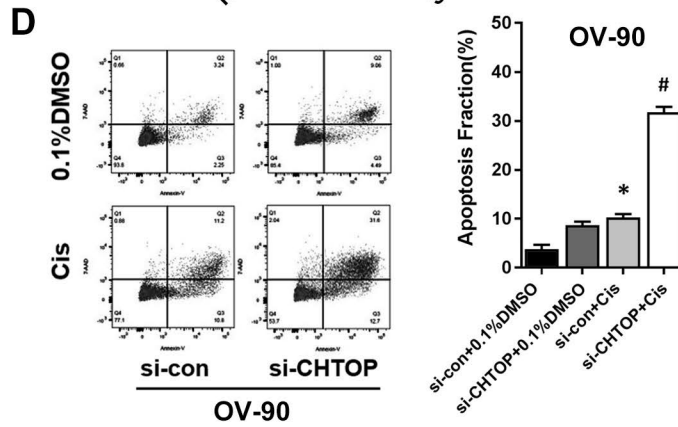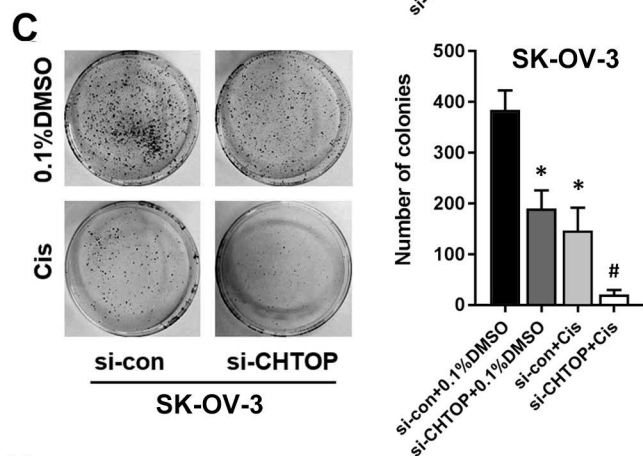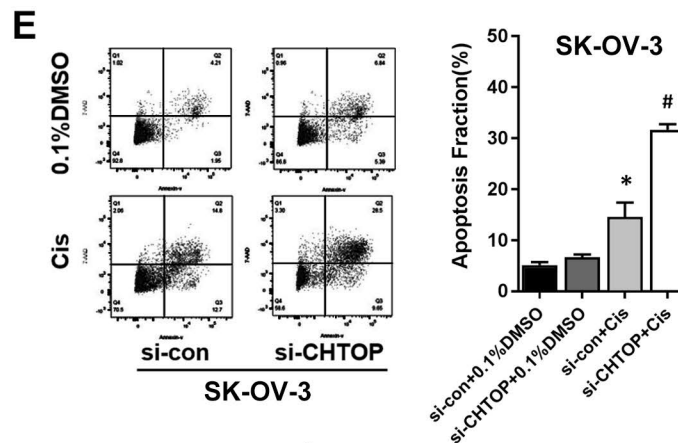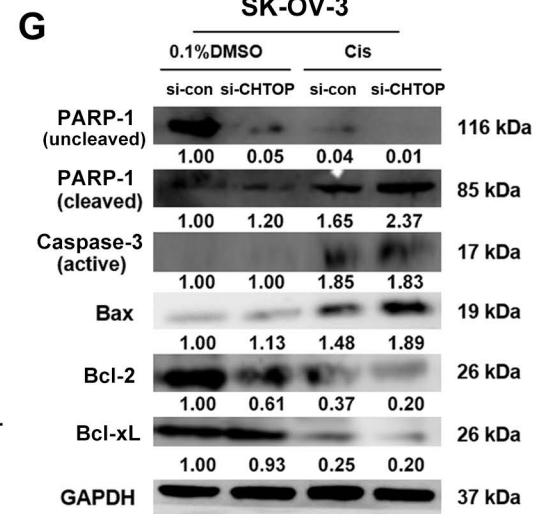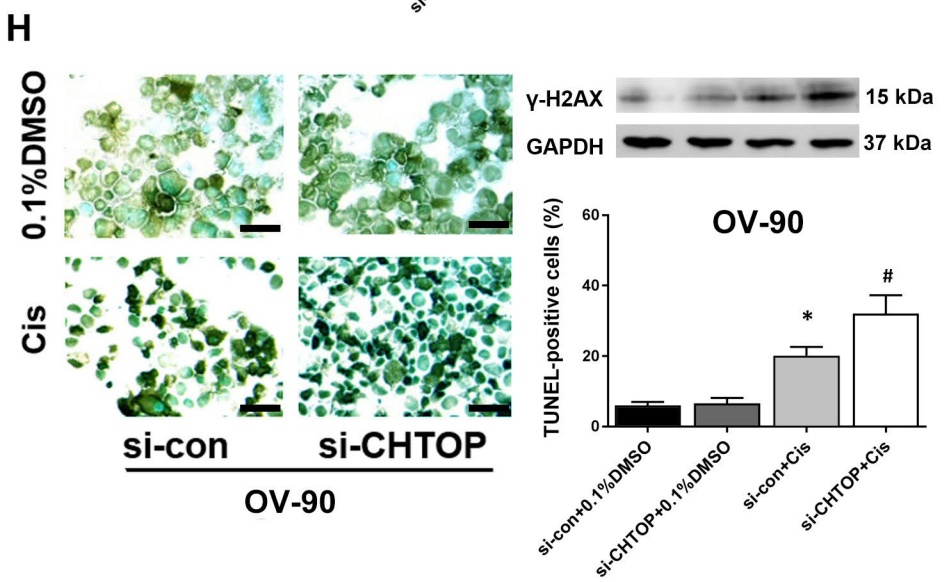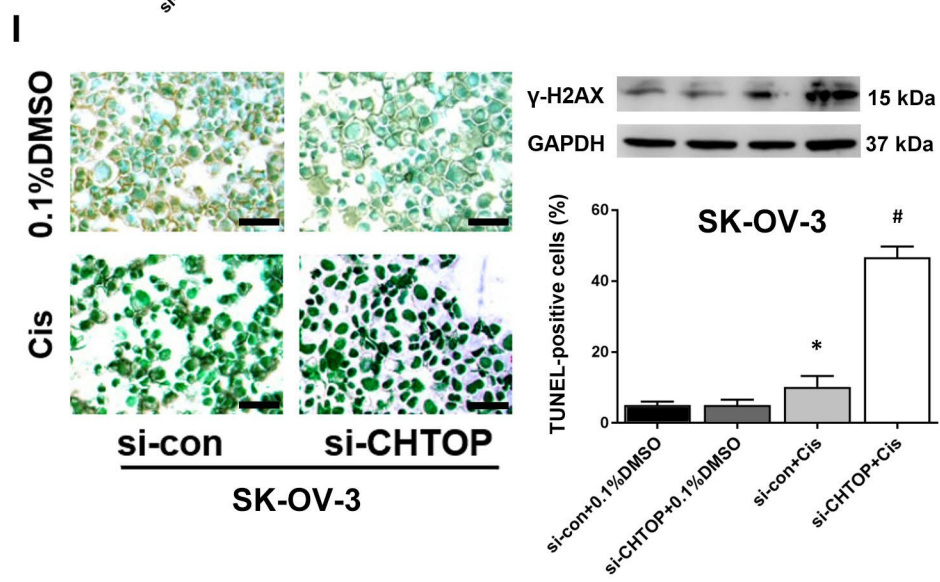

Supplement: bsr-2019-0016_supp.pdf [file bsr-2019-0016_supp.pdf]
